# Supplementary material
Source: publisher figshare collection journal article supplement (https://gsajournals.figshare.com/ndownloader/files/24280505)
Supplement: Supplementary file 1 [file 24280505]

**Table S1 Analysis of molecular variance (AMOVA) showing the distribution of genetic diversity among and within geographic regions, and ADMIXTURE subgroups**

|  |  | **% of variance components** | |  |
| --- | --- | --- | --- | --- |
| **Sources of variation** | **Groups** | **Among groups** | **Within groups** | **FST *p-value*** |
| Geographic regions | 4 | 2.04 | 97.96 | 0.02 0.120 |
| ADMIXTURE subgroups | 6 | 28.06 | 71.94 | 0.28 0.010 |

**Note**: FST: Fixation index
